# Supplementary material for: Adjustment of the Structure of the Simplest Amino Acid Present in Nature—Glycine, toward More Environmentally Friendly Ionic Forms of Phenoxypropionate-Based Herbicides
Source: MDPI journal article supplement (doi:10.3390/ijms24021360), 2023-01-10
Supplement: s1 [file s1]

## ELECTRONIC SUPPORTING INFORMATION

### ***Adjustment of the Structure of the Simplest Amino Acid Present in Nature— Glycine, toward More Environmentally Friendly Ionic Forms of Phenoxypropionate-Based Herbicides***

Adriana Olejniczak<sup>1</sup>, Witold Stachowiak<sup>1</sup>, Tomasz Rzemieniecki<sup>1</sup>, Michał Niemczak<sup>1,\*</sup>

<sup>1</sup> Faculty of Chemical Technology, Poznan University of Technology, Poznan 60-965, Poland

\* *Corresponding author at: Poznan University of Technology, Berdychowo 4, 61-131 Poznan, Poland; Tel.: +48 616653681. E-mail: [michal.niemczak@put.poznan.pl](mailto:michal.niemczak@put.poznan.pl)*

The structures of the obtained products were confirmed with the use of  $^1\text{H}$  and  $^{13}\text{C}$  NMR analyses:

***Octyldimethylglycine hydrochloride [C<sub>8</sub>-Bet]/[HCl] (3)***

$^1\text{H}$  NMR ( $\text{CD}_3\text{OD}$ )  $\delta$  [ppm] = 0.90 (t,  $J$  = 6.8 Hz, 3H), 1.34 (s, 10H), 1.78 (m, 2H), 3.31 (s, 6H), 3.60 (m, 2H), 4.35 (s, 2H), 11.00 (s, 1H);  $^{13}\text{C}$  NMR ( $\text{CD}_3\text{OD}$ )  $\delta$  [ppm] = 167.3; 66.6; 61.9; 52.1; 32.9; 30.2; 27.3; 23.7; 23.6; 14.5.

***Decyldimethylglycine hydrochloride [C<sub>10</sub>-Bet]/[HCl] (4)***

$^1\text{H}$  NMR ( $\text{DMSO}-d_6$ )  $\delta$  [ppm] = 0.86 (t,  $J$  = 6.7 Hz, 3H), 1.24 (s, 14H), 1.67 (m, 2H), 3.22 (s, 6H), 3.52 (m, 2H), 4.42 (s, 2H), 11.01 (s, 1H);  $^{13}\text{C}$  NMR ( $\text{DMSO}-d_6$ )  $\delta$  [ppm] = 166.2; 64.0; 60.5; 50.5; 31.2; 28.6; 25.7; 22.0; 21.7; 13.9.

***Dodecyldimethylglycine hydrochloride [C<sub>12</sub>-Bet]/[HCl] (5)***

$^1\text{H}$  NMR ( $\text{CD}_3\text{OD}$ )  $\delta$  [ppm] = 0.89 (t,  $J$  = 6.6 Hz, 3H), 1.29 (s, 18H), 1.78 (m, 2H), 3.31 (s, 6H), 3.60 (m, 2H), 4.34 (s, 2H), 11.03 (s, 1H);  $^{13}\text{C}$  NMR ( $\text{CD}_3\text{OD}$ )  $\delta$  [ppm] = 167.3; 66.5; 61.9; 52.1; 33.1; 30.5; 27.3; 23.7; 23.6; 14.5.

***Tetradecyldimethylglycine hydrochloride [C<sub>14</sub>-Bet]/[HCl] (6)***

$^1\text{H}$  NMR ( $\text{CD}_3\text{OD}$ )  $\delta$  [ppm] = 0.89 (t,  $J$  = 6.8 Hz, 3H), 1.28 (s, 22H), 1.78 (m, 2H), 3.30 (s, 6H), 3.59 (m, 2H), 4.33 (s, 2H), 11.00 (s, 1H);  $^{13}\text{C}$  NMR ( $\text{CD}_3\text{OD}$ )  $\delta$  [ppm] = 167.3; 66.5; 61.9; 52.1; 33.1; 30.6; 27.3; 25.6; 23.7; 14.5.

***Hexadecyldimethylglycine hydrochloride [C<sub>16</sub>-Bet]/[HCl] (7)***

$^1\text{H}$  NMR ( $\text{CD}_3\text{OD}$ )  $\delta$  [ppm] = 0.90 (t,  $J$  = 6.9 Hz, 3H), 1.28 (s, 26H), 1.77 (m, 2H), 3.30 (s, 6H), 3.58 (m, 2H), 4.32 (s, 2H), 11.00 (s, 1H);  $^{13}\text{C}$  NMR ( $\text{CD}_3\text{OD}$ )  $\delta$  [ppm] = 167.3; 66.5; 61.9; 52.1; 33.1; 30.7; 27.3; 25.6; 23.7; 14.5.

***Butyldimethylglycinium 2-(2,4-dichlorophenoxy)propionate [C<sub>4</sub>-Bet]/[2,4-DP] (8)***

$^1\text{H}$  NMR ( $\text{CDCl}_3$ )  $\delta$  [ppm] = 0.93 (t,  $J$  = 7.3 Hz, 3H), 1.30 (q,  $J$  = 7.33 Hz, 2H), 1.62 (d,  $J$  = 6.7 Hz, 3H), 1.69 (s, 2H), 3.16 (s, 6H), 3.47 (m, 2H), 3.89 (s, 2H), 4.65 (q,  $J$  = 6.7 Hz, 1H), 6.83 (d,  $J$  = 8.9 Hz, 1H), 7.11 (dd,  $J_{1,3}$  = 8.8 Hz,  $J_{1,2}$  = 2.5 Hz, 1H), 7.32 (d,  $J$  = 2.5 Hz, 1H), 10.95 (s, 1H);  $^{13}\text{C}$  NMR ( $\text{CDCl}_3$ )  $\delta$  [ppm] = 174.2; 166.1; 152.4; 129.6; 127.4; 125.7; 123.6; 115.4; 74.4; 64.4; 63.9; 51.0; 24.4; 19.4; 18.4; 13.3.

***Hexyldimethylglycinium 2-(2,4-dichlorophenoxy)propionate [C<sub>6</sub>-Bet]/[2,4-DP] (9)***

<sup>1</sup>H NMR (CDCl<sub>3</sub>) δ [ppm] = 0.88 (t, *J* = 6.7 Hz, 3H), 1.27 (s, 6H), 1.62 (d, *J* = 6.7 Hz, 3H), 2.17 (s, 2H), 3.14 (s, 6H), 3.44 (m, 2H), 3.88 (s, 2H), 4.64 (q, *J* = 6.8 Hz, 1H), 6.83 (d, *J* = 8.8 Hz, 1H), 7.10 (dd, *J*<sub>1,3</sub> = 8.8 Hz, *J*<sub>1,2</sub> = 2.6 Hz, 1H), 7.32 (d, *J* = 2.5 Hz, 1H), 10.95 (s, 1H); <sup>13</sup>C NMR (CDCl<sub>3</sub>) δ [ppm] = 174.3; 166.4; 152.4; 129.6; 127.1; 125.7; 123.5; 115.4; 74.5; 64.6; 64.0; 50.9; 31.0; 25.7; 22.5; 22.2; 18.4; 13.7.

***Decyldimethylglycinium 2-(2,4-dichlorophenoxy)propionate [C<sub>10</sub>-Bet]/[2,4-DP] (11)***

<sup>1</sup>H NMR (CDCl<sub>3</sub>) δ [ppm] = 0.88 (t, *J* = 6.9 Hz, 3H), 1.25 (s, 14H), 1.62 (d, *J* = 6.8 Hz, 3H), 2.09 (s, 2H), 3.13 (s, 6H), 3.43 (m, 2H), 3.88 (s, 2H), 4.65 (q, *J* = 6.8 Hz, 1H), 6.83 (d, *J* = 8.8 Hz, 1H), 7.11 (dd, *J*<sub>1,3</sub> = 8.7 Hz, *J*<sub>1,2</sub> = 2.5 Hz, 1H), 7.33 (d, *J* = 2.5 Hz, 1H), 11.00 (s, 1H); <sup>13</sup>C NMR (CDCl<sub>3</sub>) δ [ppm] = 174.1; 166.6; 152.4; 129.7; 127.4; 125.8; 123.7; 115.4; 74.3; 64.7; 64.0; 50.9; 31.7; 29.3; 29.0; 26.1; 22.5; 18.4; 14.0.

***Dodecyldimethylglycinium 2-(2,4-dichlorophenoxy)propionate [C<sub>12</sub>-Bet]/[2,4-DP] (12)***

<sup>1</sup>H NMR (CDCl<sub>3</sub>) δ [ppm] = 0.88 (t, *J* = 6.8 Hz, 3H), 1.26 (s, 18H), 1.63 (d, *J* = 6.7 Hz, 3H), 2.17 (s, 2H), 3.17 (s, 6H), 3.45 (m, 2H), 3.89 (s, 2H), 4.65 (q, *J* = 6.8 Hz, 1H), 6.84 (d, *J* = 8.9 Hz, 1H), 7.10 (dd, *J*<sub>1,3</sub> = 8.8 Hz, *J*<sub>1,2</sub> = 2.6 Hz, 1H), 7.32 (d, *J* = 2.5 Hz, 1H), 11.00 (s, 1H); <sup>13</sup>C NMR (CDCl<sub>3</sub>) δ [ppm] = 174.4; 166.3; 152.5; 129.6; 127.3; 125.7; 123.6; 115.4; 74.5; 64.6; 64.0; 51.0; 31.7; 29.5; 26.1; 24.0; 22.5; 18.4; 13.9.

***Hexadecyldimethylglycinium 2-(2,4-dichlorophenoxy)propionate [C<sub>16</sub>-Bet]/[2,4-DP] (14)***

<sup>1</sup>H NMR (CDCl<sub>3</sub>) δ [ppm] = 0.88 (t, *J* = 6.7 Hz, 3H), 1.26 (s, 26H), 1.64 (d, *J* = 6.9 Hz, 3H), 2.69 (s, 2H), 3.17 (s, 6H), 3.47 (m, 2H), 3.90 (s, 2H), 4.64 (d, *J* = 6.8 Hz, 1H), 6.83 (d, *J* = 8.9 Hz, 1H), 7.11 (dd, *J*<sub>1,3</sub> = 8.8 Hz, *J*<sub>1,2</sub> = 2.6 Hz, 1H), 7.32 (d, *J* = 2.6 Hz, 1H), 11.00 (s, 1H); <sup>13</sup>C NMR (CDCl<sub>3</sub>) δ [ppm] = 174.6; 166.5; 152.6; 129.7; 127.3; 125.7; 123.7; 115.4; 74.7; 64.7; 64.1; 51.0; 31.7; 29.5; 29.0; 26.1; 22.5; 18.5; 14.0.

**Table S1.** Chemical shifts [ppm] of selected protons in <sup>1</sup>H NMR spectra of products (3–7).
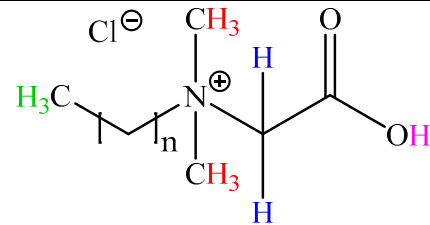

| No             | n  | CH <sub>3</sub> | N-(CH <sub>3</sub> ) <sub>2</sub> | N-CH <sub>2</sub> -CO | COOH     |
|----------------|----|-----------------|-----------------------------------|-----------------------|----------|
| 3 <sup>a</sup> | 7  | 0.90(t)         | 3.31(s)                           | 4.35(s)               | 11.00(s) |
| 4 <sup>b</sup> | 9  | 0.86(t)         | 3.22(s)                           | 4.42(s)               | 11.01(s) |
| 5 <sup>a</sup> | 11 | 0.89(t)         | 3.31(s)                           | 4.34(s)               | 11.03(s) |
| 6 <sup>a</sup> | 13 | 0.89(t)         | 3.30(s)                           | 4.33(s)               | 11.00(s) |
| 7 <sup>a</sup> | 15 | 0.90(t)         | 3.30(s)                           | 4.32(s)               | 11.01(s) |

s – singlet, t – triplet, solvent - <sup>a</sup> CD<sub>3</sub>OD, <sup>b</sup> DMSO-*d*<sub>6</sub>**Table S2.** Chemical shifts [ppm] of selected carbons in <sup>13</sup>C NMR spectra of products (3–7).
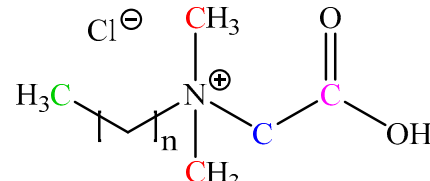

| No             | n  | CH <sub>3</sub> | N-(CH <sub>3</sub> ) <sub>2</sub> | N-CH <sub>2</sub> -CO | COOH  |
|----------------|----|-----------------|-----------------------------------|-----------------------|-------|
| 3 <sup>a</sup> | 7  | 14.5            | 52.1                              | 61.9                  | 167.3 |
| 4 <sup>b</sup> | 9  | 13.9            | 50.5                              | 60.5                  | 166.3 |
| 5 <sup>a</sup> | 11 | 14.5            | 52.1                              | 61.9                  | 167.3 |
| 6 <sup>a</sup> | 13 | 14.5            | 52.1                              | 61.9                  | 167.3 |
| 7 <sup>a</sup> | 15 | 14.5            | 52.1                              | 61.9                  | 167.3 |

solvent - <sup>a</sup> CD<sub>3</sub>OD, <sup>b</sup> DMSO-*d*<sub>6</sub>

**Table S3.** Chemical shifts [ppm] of selected protons from cation in  $^1\text{H}$  NMR spectra of ILs.
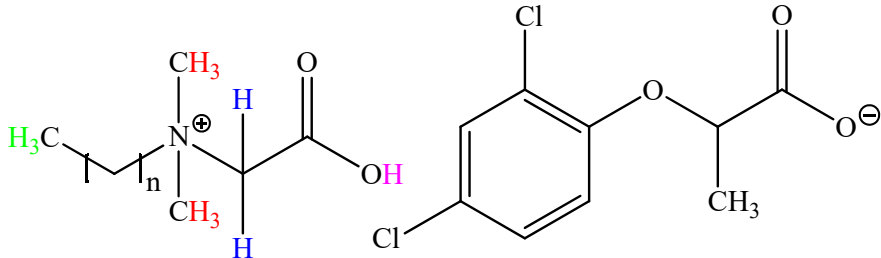

| No | n  | CH <sub>3</sub> -R | N-(CH <sub>3</sub> ) <sub>2</sub> | N-CH <sub>2</sub> -CO | COOH     |
|----|----|--------------------|-----------------------------------|-----------------------|----------|
| 8  | 7  | 0.93(t)            | 3.16(s)                           | 3.89(s)               | 10.95(s) |
| 9  | 9  | 0.88(t)            | 3.14(s)                           | 3.88(s)               | 10.95(s) |
| 11 | 11 | 0.88(t)            | 3.13(s)                           | 3.88(s)               | 11.00(s) |
| 12 | 13 | 0.88(t)            | 3.17(s)                           | 3.89(s)               | 11.00(s) |
| 14 | 15 | 0.88(t)            | 3.17(s)                           | 3.90(s)               | 11.01(s) |

s – singlet, t – triplet, solvent – CDCl<sub>3</sub>**Table S4.** Chemical shifts [ppm] of selected protons from anion in  $^1\text{H}$  NMR spectra of ILs.
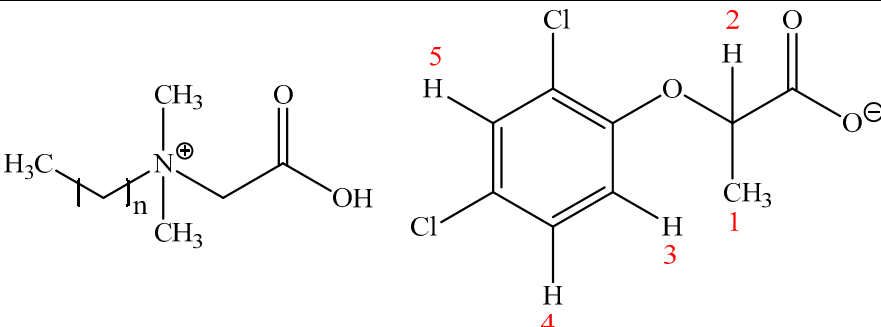

| No | n  | 1       | 2       | 3       | 4        | 5       |
|----|----|---------|---------|---------|----------|---------|
| 8  | 7  | 1.62(d) | 4.64(q) | 6.83(d) | 7.11(dd) | 7.32(d) |
| 9  | 9  | 1.62(d) | 4.64(q) | 6.83(d) | 7.10(dd) | 7.32(d) |
| 11 | 11 | 1.62(d) | 4.65(q) | 6.83(d) | 7.11(dd) | 7.33(d) |
| 12 | 13 | 1.63(d) | 4.65(q) | 6.84(d) | 7.10(dd) | 7.32(d) |
| 14 | 15 | 1.64(d) | 4.64(d) | 6.83(d) | 7.11(dd) | 7.32(d) |

d – doublet; dd – doublet of doublets, q – quartet, solvent – CDCl<sub>3</sub>

**Table S5.** Chemical shifts [ppm] of selected carbons from cation in  $^{13}\text{C}$  NMR spectra of ILs.
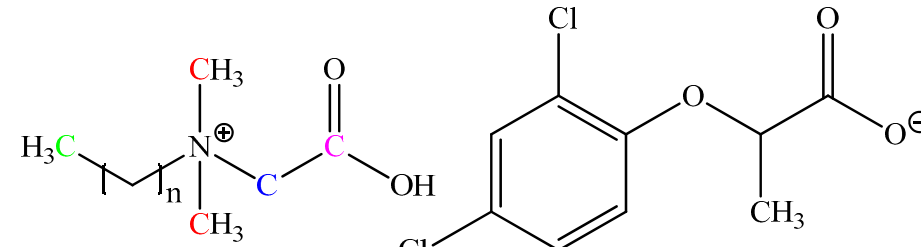

| No | n  | CH <sub>3</sub> -R | N-(CH <sub>3</sub> ) <sub>2</sub> | N-CH <sub>2</sub> -CO | COOH  |
|----|----|--------------------|-----------------------------------|-----------------------|-------|
| 8  | 7  | 13.3               | 51.0                              | 63.9                  | 166.6 |
| 9  | 9  | 13.7               | 50.9                              | 64.0                  | 166.4 |
| 11 | 11 | 14.0               | 50.9                              | 64.0                  | 166.6 |
| 12 | 13 | 13.9               | 51.0                              | 64.0                  | 166.3 |
| 14 | 15 | 14.0               | 51.0                              | 64.1                  | 165.5 |

solvent – CDCl<sub>3</sub>**Table S6.** Chemical shifts [ppm] of selected carbons from anion in  $^{13}\text{C}$  NMR spectra of ILs.
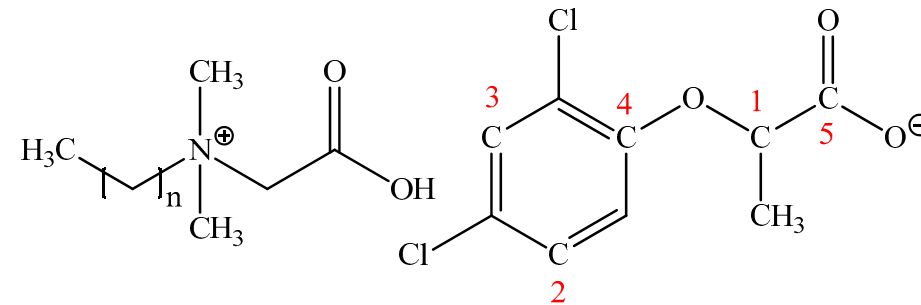

| No | n  | 1    | 2     | 3     | 4     | 5     |
|----|----|------|-------|-------|-------|-------|
| 8  | 7  | 74.4 | 127.4 | 129.6 | 152.4 | 174.2 |
| 9  | 9  | 74.5 | 127.4 | 129.6 | 152.4 | 174.3 |
| 11 | 11 | 74.3 | 127.4 | 129.7 | 152.4 | 174.1 |
| 12 | 13 | 74.5 | 127.3 | 129.6 | 152.5 | 174.4 |
| 14 | 15 | 74.7 | 127.3 | 129.7 | 152.6 | 174.6 |

solvent – CDCl<sub>3</sub>

**Table S7.** Densities [ $\text{g}\cdot\text{cm}^{-3}$ ] of ILs **8–14** in a temperature range from 20 to 80 °C.

| No        | Temperature [°C] |      |      |      |      |      |      |
|-----------|------------------|------|------|------|------|------|------|
|           | 20               | 30   | 40   | 50   | 60   | 70   | 80   |
| <b>8</b>  | 1.23             | 1.22 | 1.21 | 1.21 | 1.20 | 1.19 | 1.18 |
| <b>9</b>  | 1.21             | 1.20 | 1.19 | 1.18 | 1.18 | 1.17 | 1.16 |
| <b>10</b> | 1.16             | 1.15 | 1.14 | 1.13 | 1.13 | 1.12 | 1.11 |
| <b>11</b> | 1.15             | 1.14 | 1.13 | 1.12 | 1.11 | 1.10 | 1.10 |
| <b>12</b> | 1.13             | 1.12 | 1.11 | 1.10 | 1.09 | 1.09 | 1.08 |
| <b>13</b> | 1.08             | 1.07 | 1.07 | 1.06 | 1.05 | 1.04 | 1.04 |
| <b>14</b> | 1.08             | 1.07 | 1.06 | 1.05 | 1.05 | 1.04 | 1.03 |

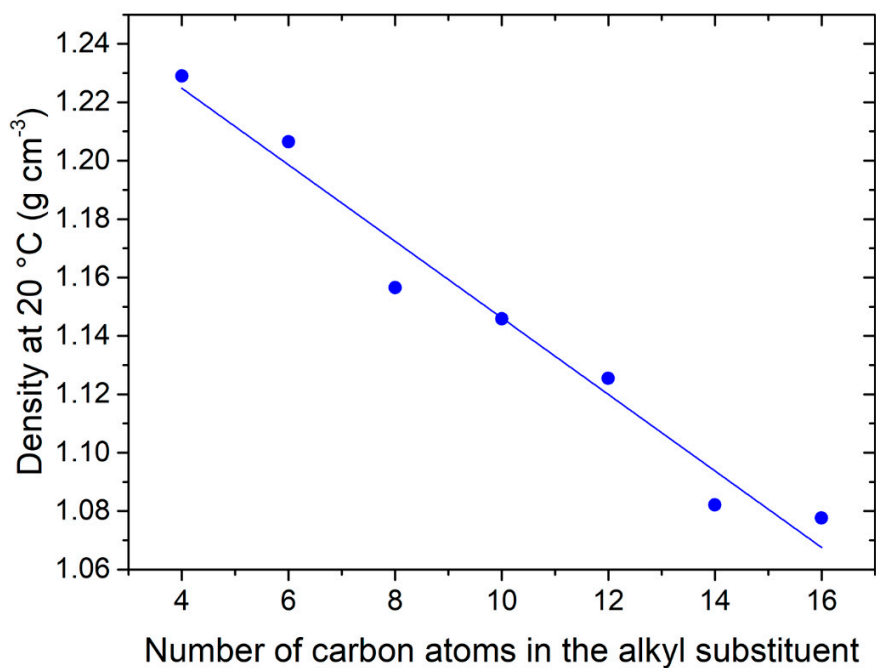

**Figure S1.** Relationship between alkyl substituent length in the cation and the densities of ILs **8–14** at 20 °C.

**Table S8.** Refractive indices of ILs **8–14** in a temperature range from 20 to 80 °C.

| No        | Temperature [°C] |       |       |       |       |       |       |
|-----------|------------------|-------|-------|-------|-------|-------|-------|
|           | 20               | 30    | 40    | 50    | 60    | 70    | 80    |
| <b>8</b>  | 1.522            | 1.517 | 1.513 | 1.509 | 1.506 | 1.503 | 1.499 |
| <b>9</b>  | 1.521            | 1.517 | 1.514 | 1.511 | 1.508 | 1.505 | 1.502 |
| <b>10</b> | 1.508            | 1.504 | 1.501 | 1.497 | 1.494 | 1.492 | 1.490 |
| <b>11</b> | 1.507            | 1.504 | 1.500 | 1.497 | 1.494 | 1.491 | 1.489 |
| <b>12</b> | 1.503            | 1.500 | 1.496 | 1.493 | 1.492 | 1.489 | 1.488 |
| <b>13</b> | 1.497            | 1.494 | 1.491 | 1.488 | 1.486 | 1.485 | 1.482 |
| <b>14</b> | 1.498            | 1.493 | 1.490 | 1.486 | 1.484 | 1.482 | 1.479 |

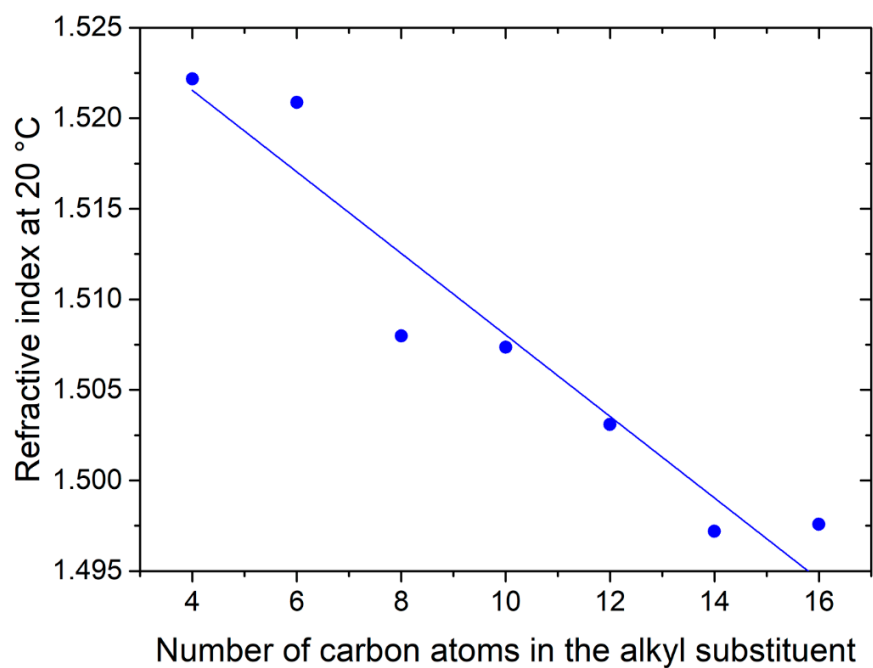

**Figure S2.** Relationship between alkyl substituent length in the cation and the refractive indices of ILs **8–14** at 20 °C.



**Table S9.** Viscosities [Pa·s] of ILs **8–14** in a temperature range from 20 to 80 °C.

| No        | Temperature [°C] |        |       |       |      |      |      |
|-----------|------------------|--------|-------|-------|------|------|------|
|           | 20               | 30     | 40    | 50    | 60   | 70   | 80   |
| <b>8</b>  | 480.73           | 81.78  | 18.14 | 5.27  | 1.78 | 0.71 | 0.31 |
| <b>9</b>  | 1725.30          | 257.93 | 53.04 | 14.25 | 4.70 | 1.85 | 0.80 |
| <b>10</b> | 1800.70          | 282.17 | 61.22 | 17.15 | 5.79 | 2.30 | 1.01 |
| <b>11</b> | 54.35            | 15.25  | 5.14  | 2.06  | 0.92 | 0.46 | 0.26 |
| <b>12</b> | 48.50            | 14.41  | 5.14  | 2.12  | 0.98 | 0.50 | 0.29 |
| <b>13</b> | 14.15            | 4.88   | 1.94  | 0.88  | 0.44 | 0.25 | 0.15 |
| <b>14</b> | 38.70            | 11.34  | 4.04  | 1.65  | 0.76 | 0.39 | 0.22 |

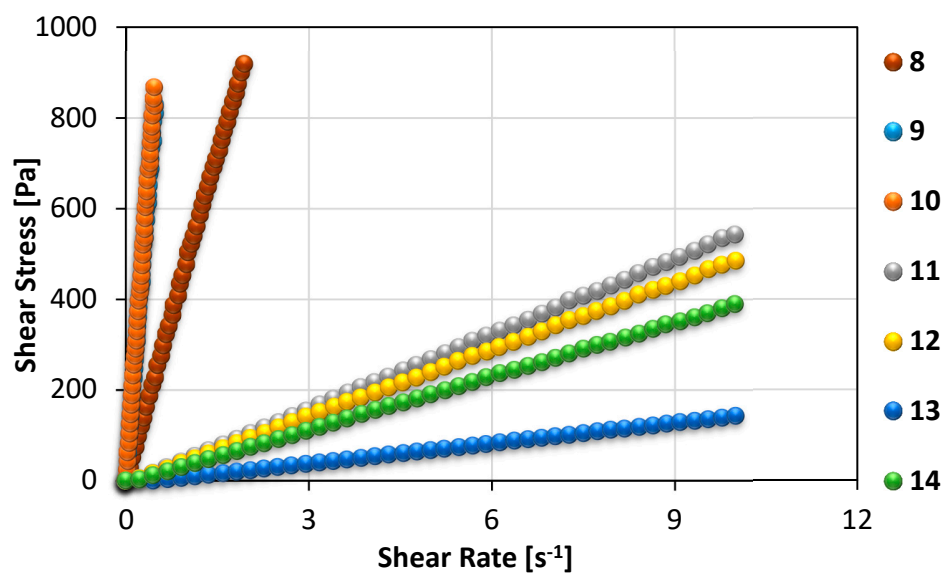

**Figure S3.** Shear stress versus shear rate for ILs **8–14**.

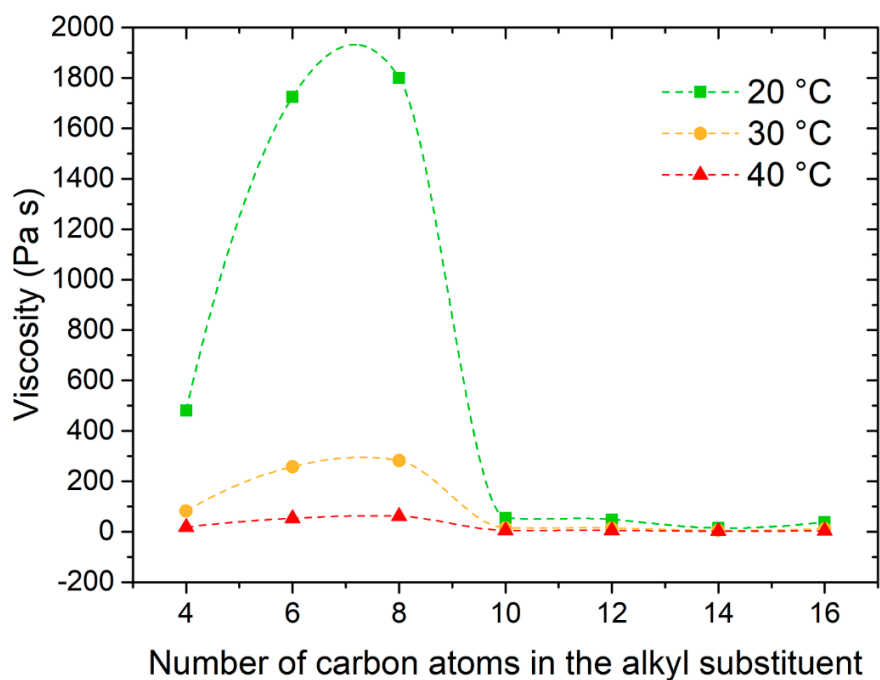

**Figure S4.** Relationship between alkyl substituent length in the cation and the viscosities of ILs **8–14** at 20, 30 and 40 °C.

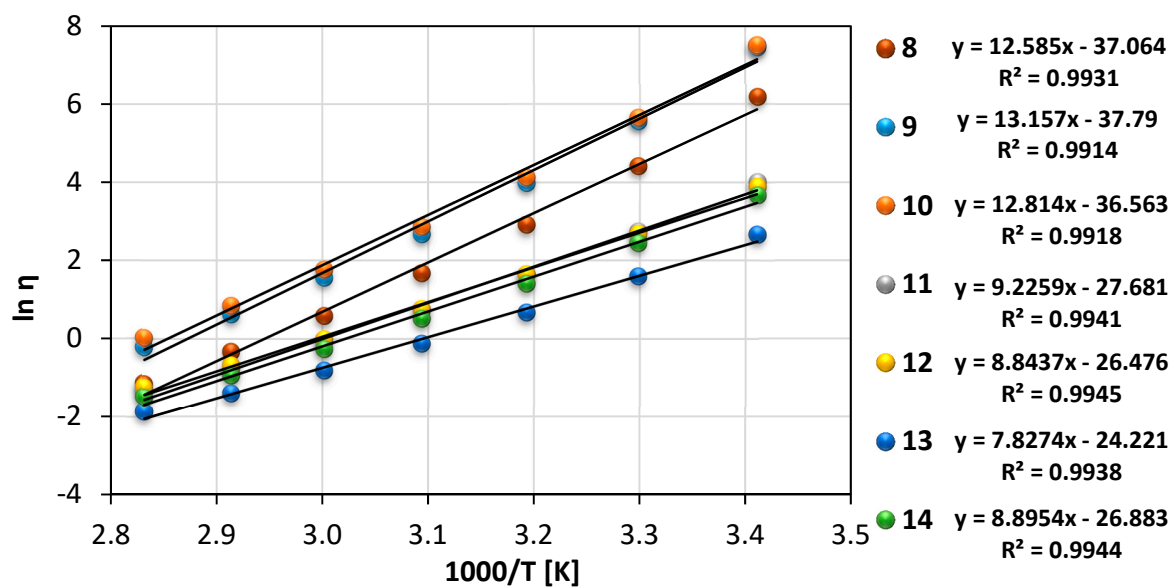

**Figure S5.** Arrhenius plots for ILs **8–14**, where  $\eta$  is viscosity and  $T$  is temperature.

**Table S10.** Biological activity of ILs **8–14** toward oilseed rape; **REF1** – potassium 2-(2,4-dichlorophenoxy)propionate, **REF2** – Aminopielik Standard 600 SL.

| Substance*                                                                         | R                               | SE**<br>[%] | Mass reduction<br>[%] |
|------------------------------------------------------------------------------------|---------------------------------|-------------|-----------------------|
| Untreated control                                                                  | -                               | 2.5         | 0 a***                |
| <b>8</b>                                                                           | C <sub>4</sub> H <sub>9</sub>   | 4.9         | 16.8 b                |
| <b>9</b>                                                                           | C <sub>6</sub> H <sub>13</sub>  | 4.3         | 19.0 b                |
| <b>10</b>                                                                          | C <sub>8</sub> H <sub>17</sub>  | 2.1         | 44.7 cd               |
| <b>11</b>                                                                          | C <sub>10</sub> H <sub>21</sub> | 7.2         | 46.1 cd               |
| <b>12</b>                                                                          | C <sub>12</sub> H <sub>25</sub> | 3.5         | 55.5 d                |
| <b>13</b>                                                                          | C <sub>14</sub> H <sub>29</sub> | 3.7         | 50.9 cd               |
| <b>14</b>                                                                          | C <sub>16</sub> H <sub>33</sub> | 6.9         | 45.6 cd               |
| <b>REF1</b>                                                                        | -                               | 2.8         | 42.4 c                |
| <b>REF2</b>                                                                        | -                               | 3.7         | 11.3 b                |
| HSD (0.05)                                                                         |                                 |             | 10.9                  |
| *All tested products were used in a dose of 400 g of active ingredient per hectare |                                 |             |                       |
| ** SE – standard error                                                             |                                 |             |                       |
| *** a–d different letters indicate statistically different mean HSD (p < 0.05)     |                                 |             |                       |

**Table S11.** Green Chemistry Metrics. [1]

| No | <i>Atom economy</i><br>(%) | <i>Percentage yield</i><br>(%) | <i>Reaction mass efficiency</i> | <i>Environmental factor*</i><br>(E-factor) |
|----|----------------------------|--------------------------------|---------------------------------|--------------------------------------------|
| 8  | 72                         | 74                             | 0.54                            | 0.43                                       |
| 9  | 73                         | 63                             | 0.47                            | 0.44                                       |
| 10 | 75                         | 72                             | 0.54                            | 0.38                                       |
| 11 | 76                         | 84                             | 0.64                            | 0.33                                       |
| 12 | 77                         | 81                             | 0.63                            | 0.32                                       |
| 13 | 78                         | 81                             | 0.64                            | 0.30                                       |
| 14 | 79                         | 83                             | 0.66                            | 0.28                                       |

\* Higher E-factors are relatively less desirable. For bulk chemicals, manufactured in amounts of hundreds of thousands to millions of tons per year, tolerable E-factors typically range from 1 to 5. For commercially produced pharmaceuticals E-factor is extremely high and generally exceeds 50. The elaborated methodology exhibits E-factor lower than 1, hence, can be considered as sustainable and appropriately developed in accordance to green chemistry principles.

[1] Sheldon, R.A. Metrics of Green Chemistry and Sustainability: Past, Present, and Future. *ACS Sustainable Chem. Eng.* **2018**, 6, 32–48, doi:10.1021/acssuschemeng.7b03505.
